# Supplementary material for: Highly modified spontaneous emission in NaY(MoO4)2:Yb3+/Er3+ inverse opal photonic crystals
Source: Royal Society of Chemistry journal article supplement (doi:10.1039/c5ra23678a), 2015-01-01
Supplement: c5ra23678a1.pdf [file c5ra23678a1.pdf]

## Highly modified spontaneous emission in $\text{NaY}(\text{MoO}_4)_2$ : $\text{Yb}^{3+}/\text{Er}^{3+}$ inverse opal photonic crystals

**Shaobo Cui<sup>a, b</sup>, Wen Xu<sup>\*a</sup>, Yongsheng Zhu<sup>c</sup>, Xu Chen<sup>a</sup>, Donglei Zhou<sup>a</sup>, Ze Yin<sup>a</sup>, Hongwei Song<sup>\*a</sup>, Wei Han<sup>\*b</sup>**

<sup>a</sup>State Key Laboratory on Integrated Optoelectronics, College of Electronic Science and Engineering, Jilin University, 2699 Qianjin Street, Changchun 130012, China.

<sup>b</sup>College of Physics, Jilin University, 2699 Qianjin Street, Changchun 130012, China.

<sup>c</sup>Department of Physics, Nanyang Normal University, Nanyang 473061, China

## Supporting Information

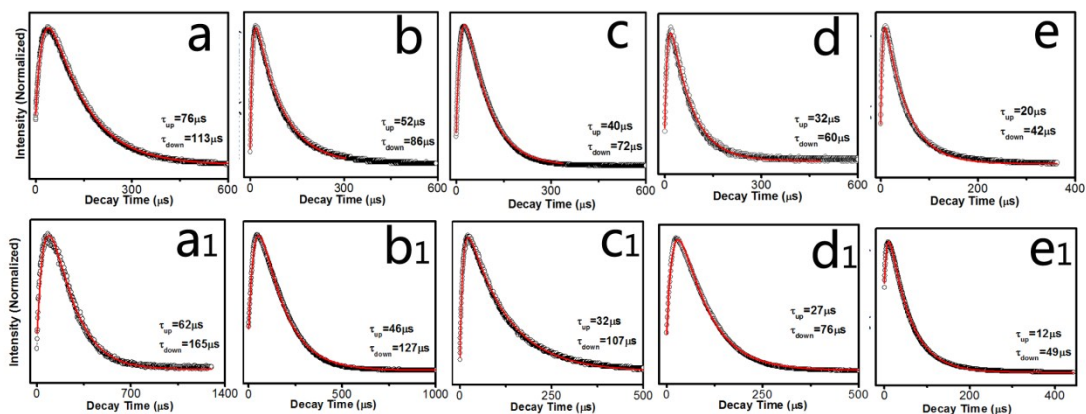

Fig. S1 The UCL decay dynamic of the  ${}^2H_{11/2} \rightarrow {}^4I_{15/2}$  transition at 533 nm of  $Er^{3+}$  ions  $NaY(MoO_4)_2:20\% Yb^{3+}/x Er^{3+}$  REF (a, b, c, d, e) and IOPC (a<sub>1</sub>, b<sub>1</sub>, c<sub>1</sub>, d<sub>1</sub>, e<sub>1</sub>) samples with the different doping concentrations of  $Er^{3+}$  ions (0.5%, 1%, 2%, 3% and 4%) by monitoring the UC emissions under the excitation of 980 nm laser.

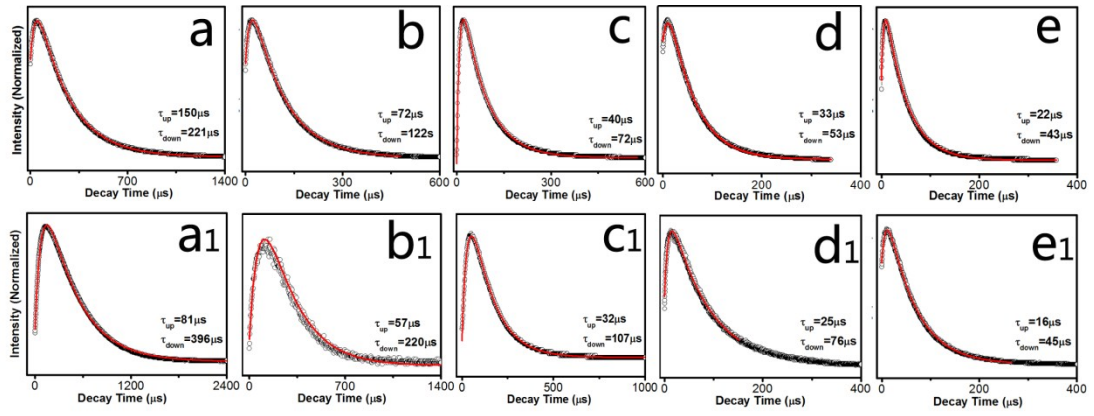

Fig. S2 The UCL decay dynamic of the  ${}^2H_{11/2} \rightarrow {}^4I_{15/2}$  transition at 533 nm of  $Er^{3+}$  ions  $NaY(MoO_4)_2 \cdot x Yb^{3+}/2\% Er^{3+}$  REF (a, b, c, d, e) and IOPC (a<sub>1</sub>, b<sub>1</sub>, c<sub>1</sub>, d<sub>1</sub>, e<sub>1</sub>) samples with the different doping concentrations of  $Yb^{3+}$  ions (5%, 10%, 20%, 30% and 40%) by monitoring the UC emissions under the excitation of 980 nm laser.
